# Supplementary material for: Type-4 Resistant Starch in Substitution for Available Carbohydrate Reduces Postprandial Glycemic Response and Hunger in Acute, Randomized, Double-Blind, Controlled Study
Source: MDPI journal article supplement (doi:10.3390/nu10020129), 2018-01-26
Supplement: s1 [file s1]

**Supplementary Table S1. Scone Formulations**

| <b>Ingredient</b>                            | <b>Control Scone</b> | <b>Fiber Scone</b> |
|----------------------------------------------|----------------------|--------------------|
| VERSAFIBE 2470 Resistant starch <sup>1</sup> | 0.0%                 | 26.6%              |
| Sugar, granulated                            | 9.6%                 | 9.6%               |
| Baking powder                                | 1.2%                 | 1.2%               |
| Baking soda                                  | 0.3%                 | 0.3%               |
| Non-iodized salt                             | 0.2%                 | 0.2%               |
| Buttermilk powder                            | 3.1%                 | 3.1%               |
| Citrus and vanilla flavoring                 | 0.5%                 | 0.5%               |
| Cinnamon                                     | 0.2%                 | 0.2%               |
| Flour, high gluten                           | 25.1%                | 8.1%               |
| Flour, pastry                                | 14.3%                | 2.6%               |
| Vital wheat gluten                           | 0.0%                 | 3.0%               |
| Cinnamon chips                               | 5.8%                 | 5.8%               |
| Shortening, all purpose                      | 13.4%                | 12.4%              |
| Water                                        | 10.6%                | 10.6%              |
| Whole eggs, frozen                           | 15.7%                | 15.7%              |

<sup>1</sup>VERSAFIBE 2470 Resistant starch is manufactured by Ingredion Incorporated, Bridgewater, NJ 08807, USA
